# Supplementary material for: Diffusion through Pig Gastric Mucin: Effect of Relative Humidity
Source: PubMed Central journal article supplement (PMC4918968; doi:10.1371/journal.pone.0157596), 2016-06-23
Supplement: pone.0157596.s001.pdf [file pone.0157596.s001.pdf]

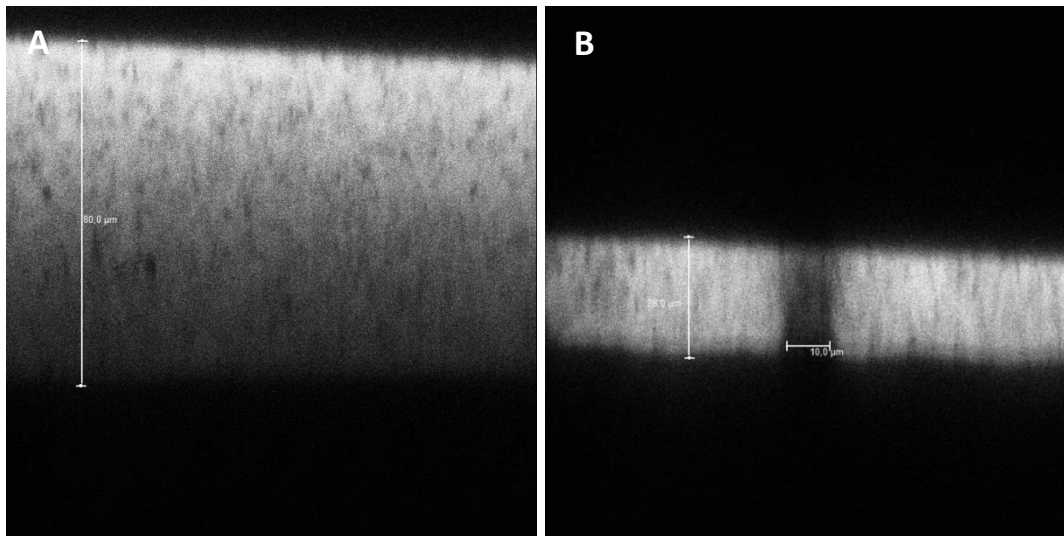

**S1 Fig. Cross section of the mucin gels used for FRAP and FCS measurements.** A) Mucin films obtained used in FRAP and FCS experiments displayed a thickness between 80-30 μm. B) Profile of the bleached area in fluorescence recovery after bleaching experiment. A cylinder with 10 μm diameter which covers most of the 30 μm thick film is bleached.
