# Supplementary material for: Diffusion through Pig Gastric Mucin: Effect of Relative Humidity
Source: PubMed Central journal article supplement (PMC4918968; doi:10.1371/journal.pone.0157596), 2016-06-23
Supplement: pone.0157596.s002.pdf [file pone.0157596.s002.pdf]

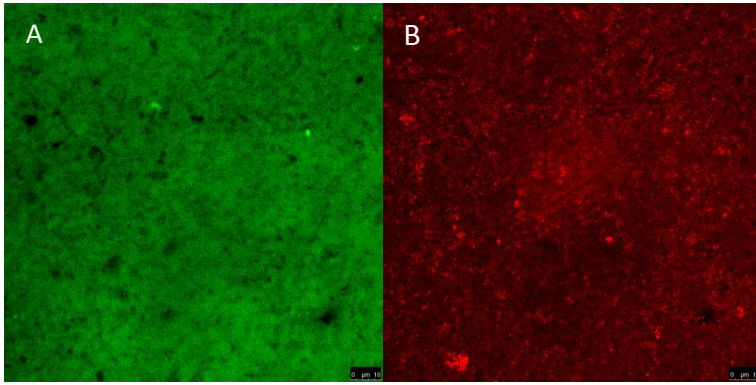

**S2 Fig. Confocal microscopy images of mucin gels.** Image taken in A) fluorescence mode where fluorescence from fluorescein can be seen and B) reflection mode where mucin aggregates are visualized.
