# Supplementary material for: Diffusion through Pig Gastric Mucin: Effect of Relative Humidity
Source: PubMed Central journal article supplement (PMC4918968; doi:10.1371/journal.pone.0157596), 2016-06-23
Supplement: pone.0157596.s008.pdf [file pone.0157596.s008.pdf]

**S1 Table. Diffusion coefficients of sodium fluorescein in mucin gels obtained by FRAP measurements.**

| <b>water activity</b> | <b>wt% mucin *</b> | <b>Osmotic pressure<br/>(MPa)</b> | <b>D<sub>fast</sub> (μm<sup>2</sup>/s)</b> | <b>D<sub>slow</sub> (μm<sup>2</sup>/s)</b> |
|-----------------------|--------------------|-----------------------------------|--------------------------------------------|--------------------------------------------|
| 0.97                  | ~50*               | 4.3                               | 0.638 ± 0.037                              | 0.141 ± 0.029                              |
| 0.94                  | 63                 | 8.7                               | 0.272 ± 0.034                              | 0.098 ± 0.038                              |
| 0.85                  | 68                 | 22.7                              | < 0.1                                      | < 0.02                                     |
| 0.81                  | 77                 | 29.5                              | < 0.1                                      | < 0.02                                     |
| 0.77                  | 80                 | 36.6                              | < 0.1                                      | < 0.02                                     |
| 0.73                  | 82                 | 44.0                              | < 0.1                                      | < 0.02                                     |
| 0.66                  | 85                 | 58.1                              | < 0.1                                      | < 0.02                                     |
| 0.35                  | 91                 | 146.8                             | < 0.1                                      | < 0.02                                     |
| 0.12                  | 95                 | 296.6                             | < 0.1                                      | < 0.02                                     |

\*Mucin concentration is calculated from water sorption isotherms previously reported (Znamenskaya et al. *J Phys Chem B* 2012 116(16) 5047-5055 and Znamenskaya et al. *J Phys Chem B* 2013 117(8):2554-2563).
